# Supplementary material
Source: MDPI journal article supplement (https://www.mdpi.com/2673-4591/19/1/2)
Supplement: s1 [file s1]

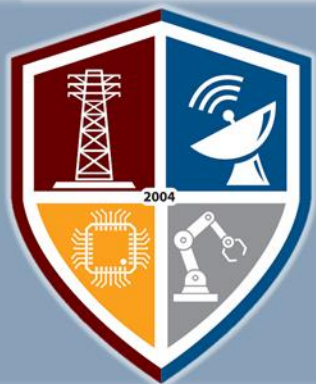

**DEPARTMENT OF  
ELECTRICAL  
ENGINEERING**  
**Government College  
University Faisalabad**

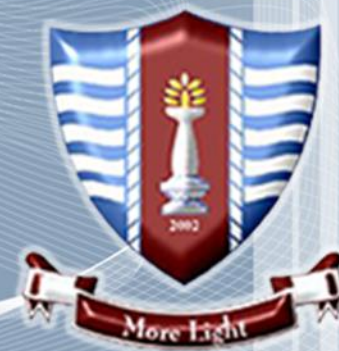

# **Design of On-Grid Photovoltaic System Considering Optimized Sizing of Photovoltaic Modules for Enhancing Output Energy**

**Muhammad Tamoor**

**[engr.muhammadtamoor@gmail.com](mailto:engr.muhammadtamoor@gmail.com)**

**ORCID: 0000-0003-0981-9904**

**Presented at the 1st International Electronic Conference on Processes: Processes System Innovation**

# Presentation Outlines

- ❖ Introduction
- ❖ Research Methodology
- ❖ Results and Discussion
- ❖ Conclusions

# Introduction

# Research Background

☞ Photovoltaic systems play a significant role for decreasing global warming and achieving climate change targets like carbon emission and environmental issues .

☞ Industrial, commercial and domestic customer are highly benefitted by standalone or grid connected PV system to reduce their peak demand.

☞ Energy security challenges have arisen as a result of increased energy demand in developing countries.

☞ On-grid Photovoltaic energy generation systems have proven to be the most cost-effective large-scale renewable energy source.

# Research Background

- ➡ A PV system that is properly designed and sized eliminates extra costs from an oversized system and insufficient power delivery from an undersized system.
- ➡ The performance of PV systems is influenced by a multitude of parameters, including the type of photovoltaic modules used, PV modules power rating, the sun irradiance potential, and the geographic location of the system.
- ➡ Photovoltaic power systems installed at the optimal inclination angle and row spacing generate maximum energy, avoid unnecessary costs, and make optimal use of the available space.

# Aim of Study

The aim of this study to analyze the simulated photovoltaic output of different PV module sizes have identical efficiency in the same fixed area using the Helioscope. With the variation of the PV module size having nearly identical efficiencies, there is a wide variation in power output. This research strongly recommended that optimum PV module size for a certain location should be evaluated using available simulation tools to ensure maximum energy from photovoltaic system.

# Research Methodology

# Research Methodology

- ➡ In order to evaluate the optimal sizing of PV modules and PV energy potential at a proposed location, a number of experiments were carried out in this study.
- ➡ There were four different rating of PV modules are analysed for each location in the experiment.
- ➡ An azimuth angle of  $180^\circ$  and a tilt angle of  $15^\circ$  were used in all four scenarios.

# Research Methodology

- ➡ The study was conducted at following locations:
  - ➡ Location 1: Energy generation by PV system installed at GC University Faisalabad
  - ➡ Location 2: Energy generation by PV system installed at University of Agriculture Faisalabad
- 
- ➡ The surface area of each location is 30,224.5 ft<sup>2</sup> for GC University Faisalabad and 54,994.4 ft<sup>2</sup> for Agriculture University Faisalabad.

# Research Methodology

☞ In this study, the Meteonorm programme and database were utilised to measure solar energy resources. For PV energy output assessment irradiance data, sunlight hours, temperatures and precipitation are all important parameters to evaluate. Seasonally, the weather change from a cold winter to a warm summer, with a high temperature of 46.0°C

# Research Methodology

☞ The monocrystalline photovoltaic module manufactured by Trina Solar are used in this study and their power rating vary from (340 watt to 540 watt).

☞ Specification of all Photovoltaic module

| Rated Maximum Power | 340     | 380     | 450     | 540     |
|---------------------|---------|---------|---------|---------|
| $V_{MP}$            | 38.200V | 40.300V | 41.000V | 31.200V |
| $V_{OC}$            | 46.200V | 48.800V | 49.600V | 37.500V |
| $I_{MP}$            | 8.900A  | 9.430A  | 10.980A | 17.330A |
| $I_{SC}$            | 9.500A  | 9.940A  | 11.530A | 18.410A |

# Research Methodology

☞ Ginlong Technologies (Solis-50K) solar inverters were used for each design.

☞ Specification of PV Inverter.

| Parameters           | Value                            |
|----------------------|----------------------------------|
| Manufacturer         | Ginlong Technologies (Solis-50K) |
| Maximum Power        | 50.0 kW                          |
| Minimum Power        | 250.0 W                          |
| Maximum Voltage      | 1,100V                           |
| Maximum MPPT Voltage | 1,000V                           |
| Minimum MPPT Voltage | 200V                             |
| Minimum Voltage      | 200V                             |
| AC Output            | 380Y/220V                        |

# Results & Discussion

# Energy Generation by PV System Installed at GC University Faisalabad

| <b>PV Rating</b> | <b>Installed PV Capacity</b> | <b>Annual Energy Generation</b> | <b>Performance Ratio</b> | <b>kWh/kWp</b> |
|------------------|------------------------------|---------------------------------|--------------------------|----------------|
| <b>340</b>       | <b>294.4 kW</b>              | <b>440.4 MWh</b>                | <b>81.2%</b>             | <b>1495.8</b>  |
| <b>380</b>       | <b>329.1 kW</b>              | <b>492.0 MWh</b>                | <b>81.2%</b>             | <b>1495.2</b>  |
| <b>450</b>       | <b>360.9 kW</b>              | <b>541.7 MWh</b>                | <b>81.5%</b>             | <b>1500.9</b>  |
| <b>540</b>       | <b>383.4 kW</b>              | <b>576.7 MWh</b>                | <b>81.7%</b>             | <b>1504.2</b>  |

☞ By comparison, we analyse that the photovoltaic energy generation system installed with 540.0 watt PV modules are more efficient installed at fixed area in GC University Faisalabad.

☞ For this case, the simulation results show that the annual energy generation of the photovoltaic system is 576.7 MWh, and the performance ratio (PR) of the system is 81.7%.

# Comparison of Monthly PV Energy Generation

Comparison of Monthly PV Energy Generation

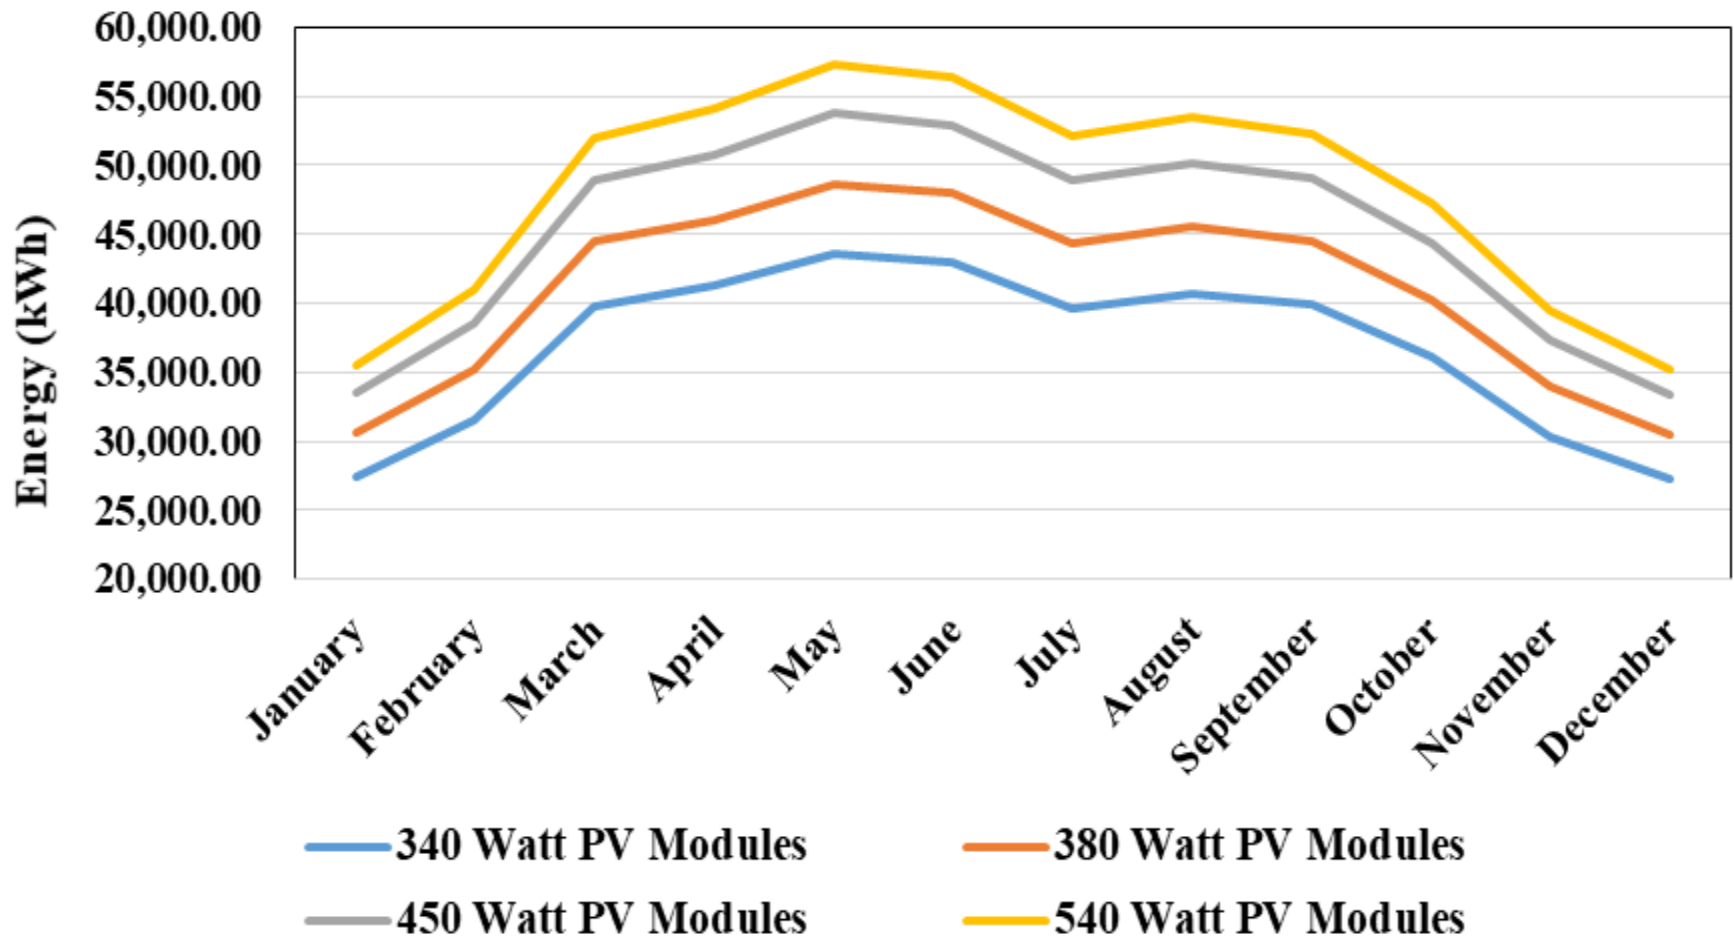

# Energy Generation by PV System Installed at University of Agriculture Faisalabad

| <b>PV Rating</b> | <b>Installed PV Capacity</b> | <b>Annual Energy Generation</b> | <b>Performance Ratio</b> | <b>kWh/kWp</b> |
|------------------|------------------------------|---------------------------------|--------------------------|----------------|
| <b>340</b>       | <b>658.2 kW</b>              | <b>944.5 MWh</b>                | <b>78.1%</b>             | <b>1434.9</b>  |
| <b>380</b>       | <b>735.7 kW</b>              | <b>1.056 GWh</b>                | <b>78.1%</b>             | <b>1435.6</b>  |
| <b>450</b>       | <b>782.1 kW</b>              | <b>1.125 GWh</b>                | <b>78.3%</b>             | <b>1438.0</b>  |
| <b>540</b>       | <b>789.5 kW</b>              | <b>1.131 GWh</b>                | <b>78.0%</b>             | <b>1433.2</b>  |

☞ By comparison, we analyse that the photovoltaic energy generation system installed with 450.0 watt PV modules are more efficient (having high PR ratio and kWh/kWp) installed at fixed area in University of Agriculture Faisalabad.

☞ For this case, the simulation results show that the annual energy generation of the photo-voltaic system is 1.125 GWh, and the performance ratio (PR) of the system is 78.3%.

# Comparison of Monthly PV Energy Generation

Comparison of Monthly PV Energy Generation

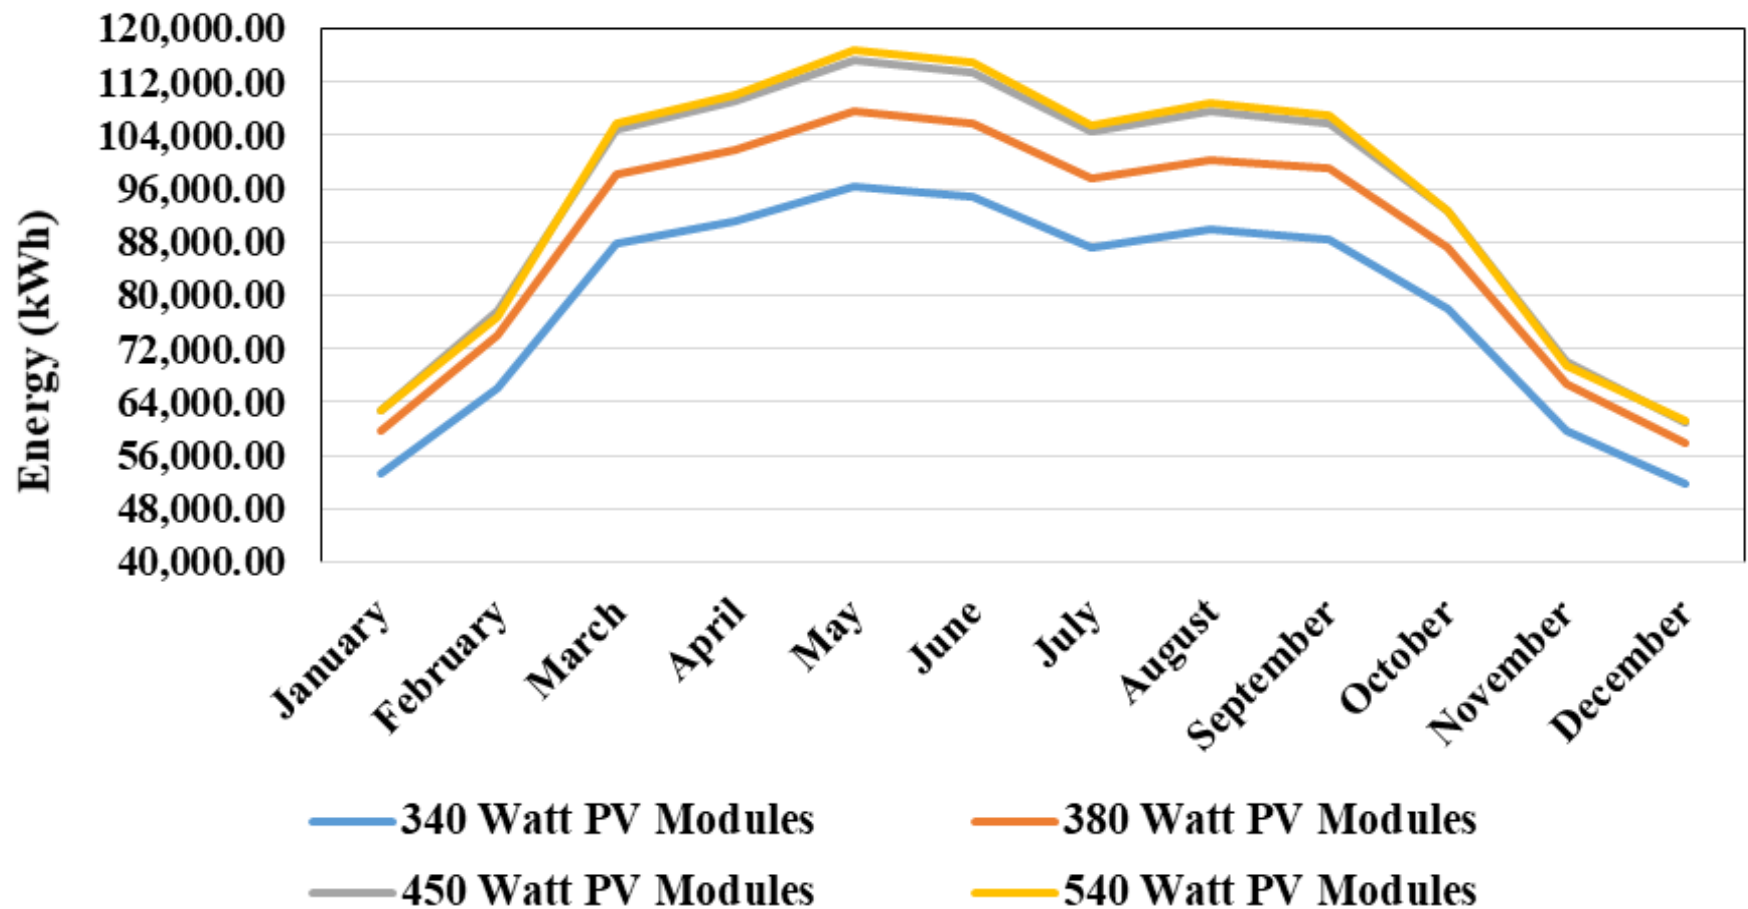

# CONCLUSION

- ➡ This study intends to emphasize the fact that when designing an On-Grid photovoltaic system, relatively little consideration is given to selecting the appropriate type and size of PV modules.
- ➡ In this research, different PV modules of various sizes and power ratings with nearly identical efficiencies were analyzed in two selected locations.
- ➡ For GC University Faisalabad, the annual energy generation of the photovoltaic system is 576.7 MWh and for University of Agriculture Faisalabad, the annual energy generation of the photovoltaic system is 1.125 GWh.
- ➡ This research strongly recommended that optimum PV module size for a certain location should be evaluated using available simulation tools to ensure maximum energy from photovoltaic system.

# Q & A
